# Supplementary material
Source: PubMed Central journal article supplement (PMC5303027)
Supplement: SD1.pdf [file SD1.pdf]

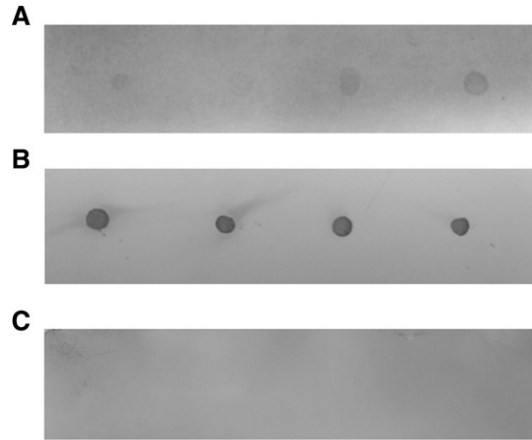

**SUPPLEMENTAL FIGURE 1.** Human C1 binds the TiCRT recombinant S domain. By Dot Blot, rTiS, human C1 (as positive control), and casein (as a negative control) were incubated for 15 minutes, blocked with 5% phosphate-buffered saline (PBS)/bovine serum albumin (BSA) and washed with PBS/Tween 20 at 0.05%. Then, rTiS was incubated with C1 (50 µg/mL) followed by a goat anti-human C1 antibody and a rabbit alkaline phosphatase-conjugated anti-goat IgG antibody. C1 or casein was incubated with the same antibodies used to detect interactions with rTiS. **(A)** rTiS, at decreasing concentrations, was incubated with C1 and an anti-C1 antibody. A dose response is observed. **(B)** C1 was used to directly sensitize the membrane at decreasing concentrations, and detected with an anti-C1 antibody. **(C)** The membrane was sensitized with casein at decreasing concentrations, and incubated with C1 and an anti-C1 antibody. As expected, no detection of the binding of C1 to casein is observed. rTiS, C1, and casein were used at 2, 1, 0.2, and 0.1 µg per dot, from left to right.

**SUPPLEMENTAL VIDEO.** A simplified cartoon shows a dynamic interpretation on how salivary TiCRT reaches the vertebrate's blood vessel via the afferent salivary canal, and how the C1/TiCRT complexes enter the insect's digestive tract via the efferent alimentary duct.
